# Supplementary material for: Contributions of Human-Associated Archaeal Metabolites to Tumor Microenvironment and Carcinogenesis
Source: PubMed Central journal article supplement (PMC9045267; doi:10.1128/spectrum.02367-21), 2022-02-28
Supplement: spectrum02367-21_supplemental_file2.pdf [file spectrum02367-21_supplemental_file2.pdf]

## Supplementary Figures and Tables

**TITLE:** Contributions of Human-associated Archaeal Metabolites to Tumor Microenvironment and Carcinogenesis

**AUTHORS:** Mingwei Cai<sup>1\*</sup>, Shruthi Kandalai<sup>2,3</sup>, Xiaoyu Tang<sup>1,4\*</sup>, and Qingfei Zheng<sup>2,3\*</sup>

**AFFILIATION:** <sup>1</sup>Institute of Chemical Biology, Shenzhen Bay Laboratory, Shenzhen, China.

<sup>2</sup>Department of Radiation Oncology, College of Medicine, The Ohio State University, Columbus, USA.

<sup>3</sup>Center for Cancer Metabolism, James Comprehensive Cancer Center, The Ohio State University

<sup>4</sup>School of Pharmaceutical Sciences, Nanjing Tech University, Nanjing, China

**\*CORRESPONDENT:** Qingfei Zheng, Tzagournis Medical Research Facility, 420 W. 12th Ave Columbus, Ohio 43210, United States; E-mail: Qingfei.Zheng@osumc.edu

Xiaoyu Tang, Room B309, Gaoke International Innovation Center, Shenzhen Bay Laboratory, Shenzhen, China; E-mail: xtang@szbl.ac.cn.

Mingwei Cai, Room B322, Gaoke International Innovation Center, Shenzhen Bay Laboratory, Shenzhen, China; E-mail: caimw@szbl.ac.cn.



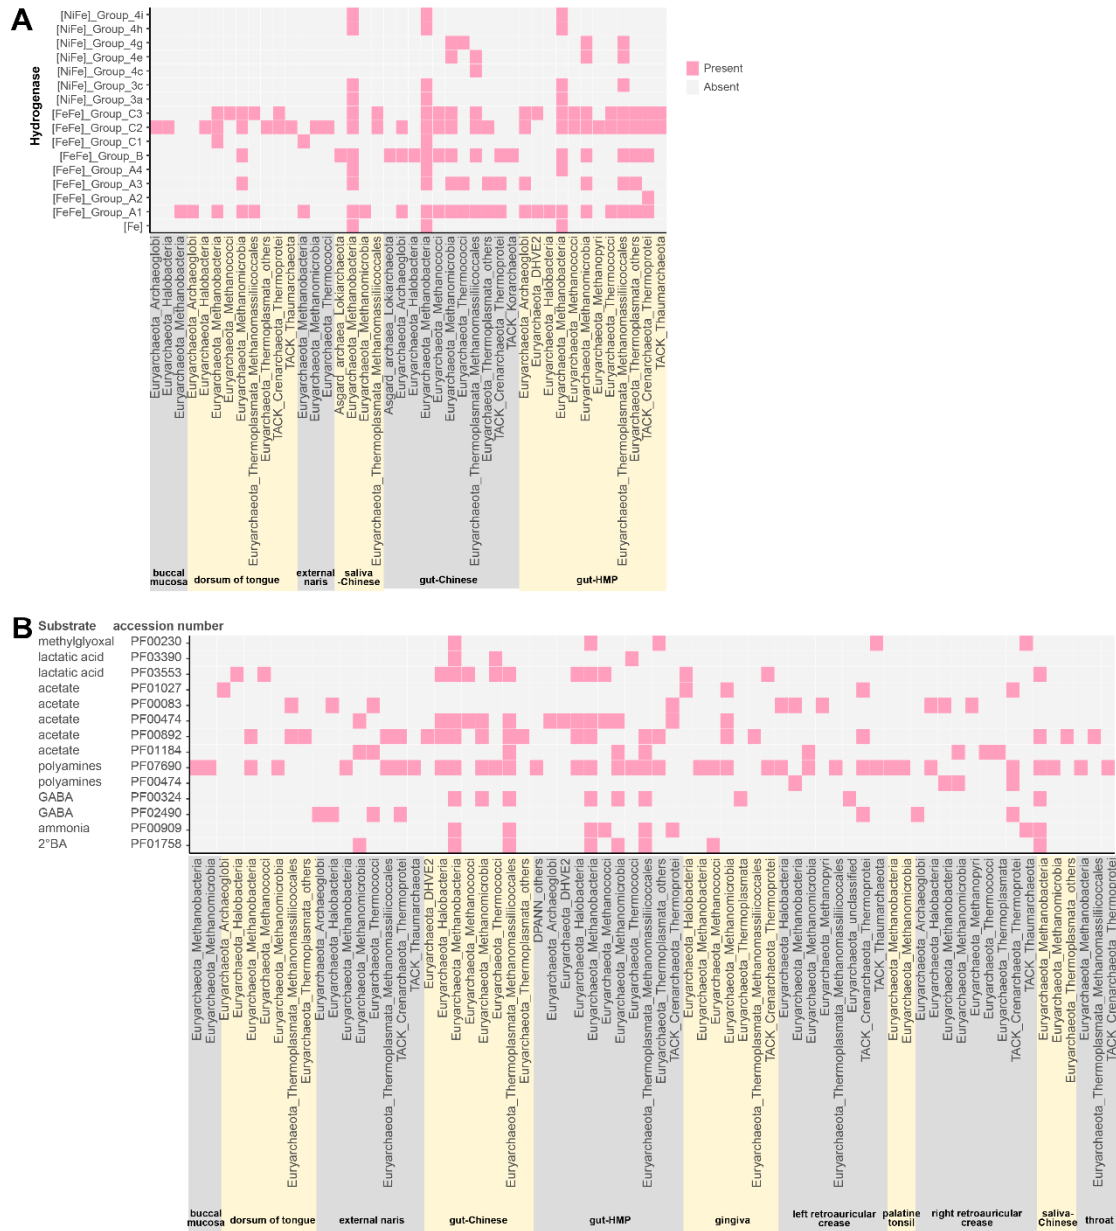

**Fig. S2** (A) Presence/absence of hydrogenase for H<sub>2</sub> uptake or evolving. (B) Enzymes encoding transporters related to the archaeal metabolites. Detailed information is available in Table S3.

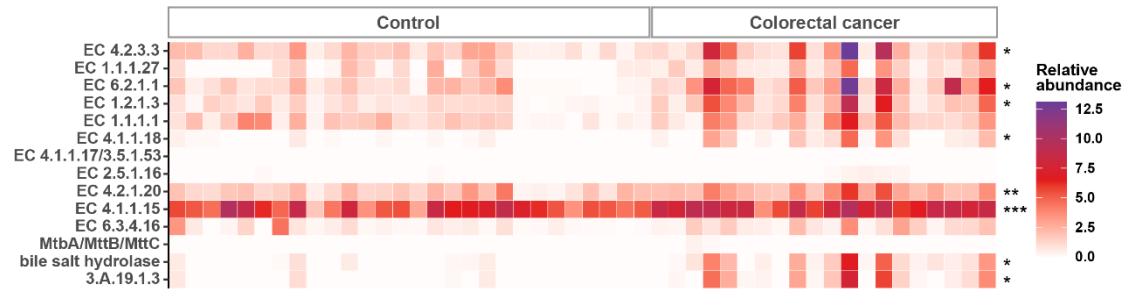

**Fig. S3** Relative abundance of genes encoding enzymes in gut samples of healthy individuals (control) and colorectal cancer patients. Relative abundance denotes the read numbers per million reads. \*\*\*,  $p < 0.001$ ; \*\*,  $p < 0.01$ ; \*,  $p < 0.05$ .

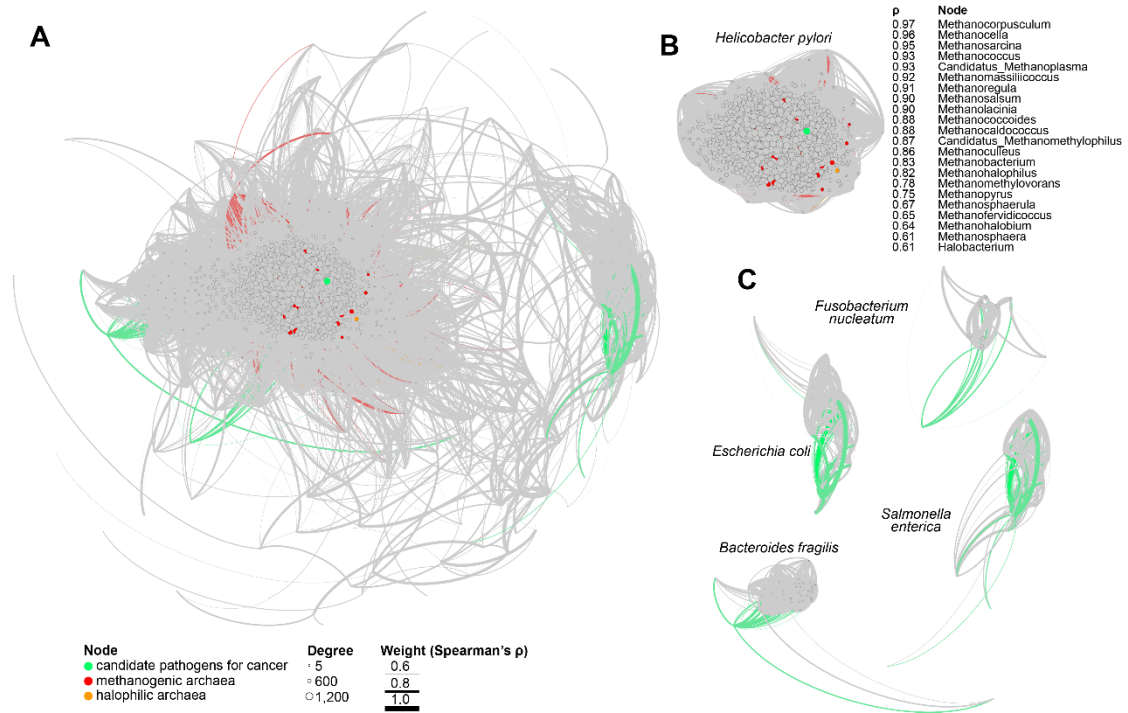

**Fig. S4** Co-occurrence of archaea with cancer pathogens. (A) Overview of the co-occurrence patterns. Only positive correlations are shown. Five candidate pathogens i.e., *Helicobacter pylori*, *Fusobacterium nucleatum*, *Escherichia coli*, *Bacteroides fragilis*, and *Salmonella enterica* are marked green. (B) Direct connections of *Helicobacter pylori* with methanogenic and halophilic archaea. (C) Direct connections of *Fusobacterium nucleatum*, *Escherichia coli*, *Bacteroides fragilis*, and *Salmonella enterica* with other microorganisms.

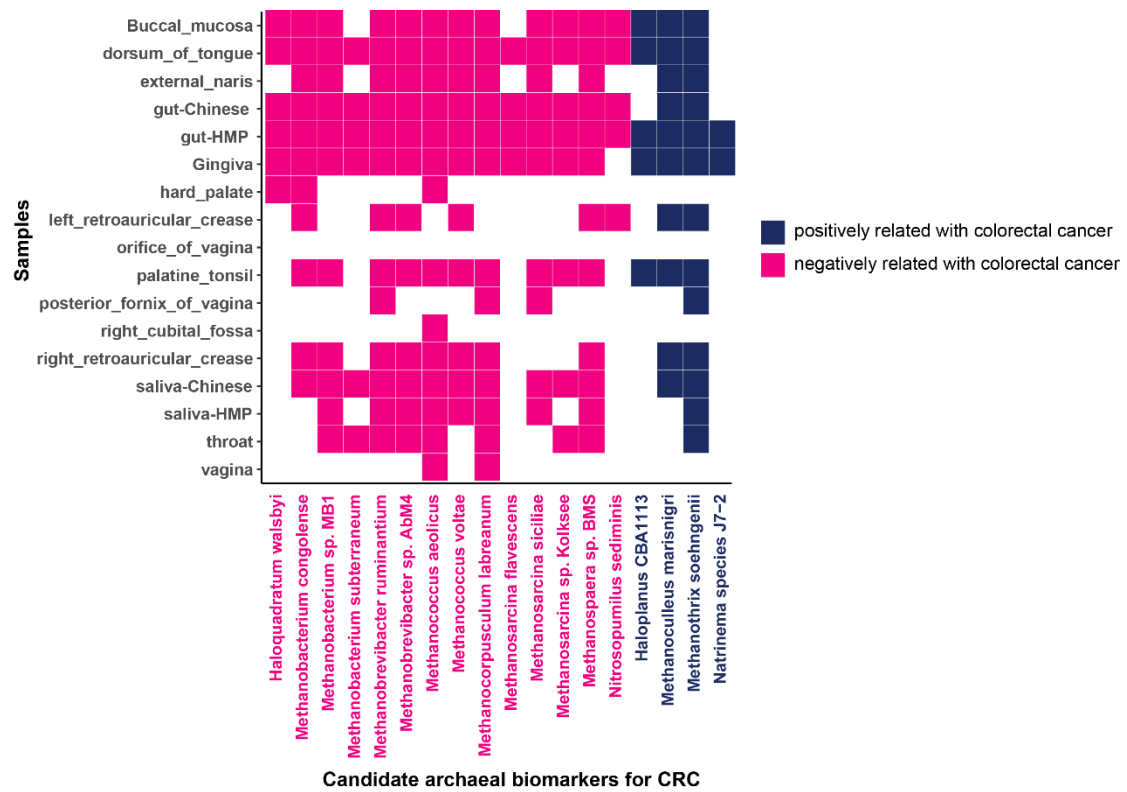

**Fig. S5** Candidate archaeal biomarkers for colorectal cancer in the investigated contigs across body sites. The archaeal biomarkers were selected based on a previous study (1).

**Table S1** Statistic information of the datasets used for analysis

| <b>bodysites</b>            | <b>Easterners<br/>or<br/>Westerners</b> | <b>no. of<br/>samples</b> | <b>no. of<br/>contigs &gt;1,000bp</b> | <b>no. of samples<br/>with candidate<br/>archaeal contigs</b> | <b>occurrence<br/>of archaeal<br/>contigs</b> | <b>no. of candidate<br/>archaeal contigs</b> | <b>average no. of<br/>archaeal contigs<br/>per sample</b> |
|-----------------------------|-----------------------------------------|---------------------------|---------------------------------------|---------------------------------------------------------------|-----------------------------------------------|----------------------------------------------|-----------------------------------------------------------|
| buccal mucosa               | Westerners                              | 376                       | 2,476,324                             | 216                                                           | 57.4                                          | 830                                          | 3.8                                                       |
| dorsum of tongue            | Westerners                              | 331                       | 10,100,586                            | 328                                                           | <b>99.1</b>                                   | 10,127                                       | 30.9                                                      |
| external naris              | Westerners                              | 257                       | 373,941                               | 58                                                            | 22.6                                          | 1,064                                        | 18.3                                                      |
| gut-Chinese                 | Easterners                              | 128                       | 4,458,712                             | 128                                                           | <b>100.0</b>                                  | 7,027                                        | <b>54.9</b>                                               |
| gut-HMP                     | Westerners                              | 289                       | 6,810,956                             | 281                                                           | <b>97.2</b>                                   | 14,994                                       | <b>53.4</b>                                               |
| gingiva                     | Westerners                              | 302                       | 6,028,963                             | 285                                                           | <b>94.4</b>                                   | 4,502                                        | 15.8                                                      |
| left retroauricular crease  | Westerners                              | 24                        | 109,232                               | 21                                                            | 87.5                                          | 1,771                                        | <b>84.3</b>                                               |
| palatine tonsil             | Westerners                              | 25                        | 347,370                               | 21                                                            | 84.0                                          | 320                                          | 15.2                                                      |
| posterior fornix of vagina  | Westerners                              | 206                       | 198,273                               | 37                                                            | 18.0                                          | 183                                          | 4.9                                                       |
| right retroauricular crease | Westerners                              | 32                        | 165,985                               | 27                                                            | 84.4                                          | 2,838                                        | <b>105.1</b>                                              |
| saliva-Chinese              | Easterners                              | 3,591                     | 903,815                               | 382                                                           | 10.6                                          | 682                                          | 1.8                                                       |
| saliva-HMP                  | Westerners                              | 22                        | 212,997                               | 16                                                            | 72.7                                          | 190                                          | 6.2                                                       |
| throat                      | Westerners                              | 18                        | 185,050                               | 8                                                             | 44.4                                          | 194                                          | 24.3                                                      |

**Table S3** Description of enzymes in Fig. 2A

| <b>Enzymes</b>       | <b>Description</b>                                                                                                                                                |
|----------------------|-------------------------------------------------------------------------------------------------------------------------------------------------------------------|
| 3.A.19.1.3           | arsenical pump membrane protein                                                                                                                                   |
| EC 1.1.1.1           | alcohol dehydrogenase, class IV                                                                                                                                   |
| EC 1.1.1.27          | lactate utilization protein                                                                                                                                       |
| EC 1.2.1.3           | actaldehyde dehydrogenase, Succinate semialdehyde dehydrogenase, $\alpha$ -ketoglutarate semialdehyde dehydrogenase or other NAD-dependent aldehyde dehydrogenase |
| EC 2.5.1.16          | spermidine synthase                                                                                                                                               |
| EC 3.5.1.24          | choloylglycine hydrolase                                                                                                                                          |
| EC 4.1.1.15          | glutamate dehydrogenase                                                                                                                                           |
| EC 4.1.1.17/3.5.1.53 | ornithine decarboxylase/N-carbamoylputrescine amidase                                                                                                             |
| EC 4.1.1.18          | possible lysine decarboxylase                                                                                                                                     |
| EC 4.2.1.20          | tryptophan synthase, alpha chain                                                                                                                                  |
| EC 4.2.3.3           | methylglyoxal synthase/Methylglyoxal synthase-like domain                                                                                                         |
| EC 6.2.1.1           | acyl-CoA synthetase                                                                                                                                               |
| EC 6.3.4.16          | carbamoylphosphate synthase large/small subunit                                                                                                                   |
| MtbA, MttB, MttC     | trimethylamine corrinoid protein                                                                                                                                  |



**Table S4** Descriptions of TCDB for archaeal metabolites transport

| Substrate     | TCDB                                                                                                                 | accession number in PF database | Annotation <sup>#</sup>                                                                                                                                                                                                                                                         |
|---------------|----------------------------------------------------------------------------------------------------------------------|---------------------------------|---------------------------------------------------------------------------------------------------------------------------------------------------------------------------------------------------------------------------------------------------------------------------------|
| methylglyoxal | 1.A.8.9.3                                                                                                            | PF00230                         | major aquaglyceroporin, LmAQP1: transports water, glycerol, methylglyoxal, trivalent metalloids such as arsenite and antimonite, dihydroxyacetone and sugar alcohols                                                                                                            |
| lactic acid   | 2.A.24.2.2                                                                                                           | PF03390                         | malate:lactate antiporter (substrates include: S-lactate, R-lactate, S-malate and S-citramalate)                                                                                                                                                                                |
| lactic acid   | 2.A.35.1.2                                                                                                           | PF03553                         | malate + H <sup>+</sup> : lactate + Na <sup>+</sup> antiporter, MleN                                                                                                                                                                                                            |
| acetate       | 1.A.14.2.2                                                                                                           | PF01027                         | the YbhL (AceP) protein. Possibly a pmf-dependent acetate uptake transporter.                                                                                                                                                                                                   |
| acetate       | 2.A.1.6.8                                                                                                            | PF00083                         | the acetate/monochloroacetate (haloacid) permease                                                                                                                                                                                                                               |
| acetate       | 2.A.21.5.3,<br>2.A.21.7.2                                                                                            | PF00474                         | Na <sup>+</sup> -dependent short chain fatty acid transporter SLC5A8 (tumor suppressor gene product, down-regulated in colon cancer) (substrates: lactate, pyruvate, acetate, propionate, butyrate (K <sub>m</sub> ≈ 1 mM))                                                     |
| acetate       | 2.A.7.3.1                                                                                                            | PF00892                         | putative acetate efflux pump, MadN                                                                                                                                                                                                                                              |
| acetate       | 2.A.96.1.1,<br>2.A.96.1.3,<br>2.A.96.1.3                                                                             | PF01184                         | acetate/succinate transporter, SatP or YaaH of 196 aas and 6 TMSs (Sá-Pessoa et al. 2013). It is specific for acetate (a monocarboxylate) and for succinate (a dicarboxylate), with affinity constants at pH 6.0 of 1.24 ± 0.13 mM for acetate and 1.18 ± 0.10 mM for succinate |
| polyamines    | 2.A.1.2.16,<br>2.A.1.2.43,<br>2.A.1.2.64,<br>2.A.1.2.66,<br>2.A.1.2.67                                               | PF07690                         | polyamines (spermine, spermidine, putrescine); paraquat; methylglyoxal bis(guanyldiazide):H <sup>+</sup> antiporter (in the plasma membrane) (activated by phosphorylation); The multidrug efflux pump, Qdr3 (exports polyamines, quinidine, barban, cisplatin and bleomycin)   |
| polyamines    | 2.A.3.4.5                                                                                                            | PF00324                         | the polyamine (putrescine > spermidine > spermine) exporter, Tpo5p (Yk1174c) [found in the Golgi or post-Golgi secretory vesicles; induction:spermine > spermidine > putrescine] (Igarashi and Kashiwagi 2010).                                                                 |
| GABA          | 2.A.18.5.1                                                                                                           | PF02490                         | vesicular $\gamma$ -aminobutyric acid (GABA) and glycine transporter                                                                                                                                                                                                            |
| GABA          | 2.A.22.3.2,<br>2.A.22.3.6                                                                                            | PF00209                         | $\gamma$ -Aminobutyric acid (GABA):Na <sup>+</sup> :Cl <sup>-</sup> symporter                                                                                                                                                                                                   |
| ammonia       | 1.A.11.1.1,<br>1.A.11.1.2,<br>1.A.11.1.3,<br>1.A.11.1.4,<br>1.A.11.1.5,<br>1.A.11.1.6,<br>1.A.11.2.1,<br>1.A.11.2.2, | PF00909                         | ammonia transporter and regulatory sensor                                                                                                                                                                                                                                       |

|      |                                                                                       |         |                                                 |
|------|---------------------------------------------------------------------------------------|---------|-------------------------------------------------|
|      | 1.A.11.2.3,<br>1.A.11.2.4,<br>1.A.11.3.1,<br>1.A.11.3.2,<br>1.A.11.3.3,<br>1.A.11.3.4 |         |                                                 |
| 2°BA | 2.A.28.1.2,<br>2.A.28.1.5,<br>2.A.28.1.6,<br>2.A.28.1.7,<br>2.A.28.1.9                | PF01758 | liver/ileal bile acid:Na <sup>+</sup> symporter |

---

#Detailed descriptions of these functions are available in the TCDB website  
<https://www.tcdb.org/search/index.php?query=&type=system>.

**Table S5** List of metagenomic datasets for analysis

| <b>Sample Name</b> | <b>Cancer type</b> | <b>Project</b> |
|--------------------|--------------------|----------------|
| SAMEA3136748       | Colorectal cancer  | PRJEB7774      |
| SAMEA3136769       | Colorectal cancer  | PRJEB7774      |
| SAMEA3136751       | Colorectal cancer  | PRJEB7774      |
| SAMEA3136738       | Colorectal cancer  | PRJEB7774      |
| SAMEA3136747       | Colorectal cancer  | PRJEB7774      |
| SAMEA3136743       | Colorectal cancer  | PRJEB7774      |
| SAMEA3136754       | Colorectal cancer  | PRJEB7774      |
| SAMEA3136765       | Colorectal cancer  | PRJEB7774      |
| SAMEA3136724       | Colorectal cancer  | PRJEB7774      |
| SAMEA3136755       | Colorectal cancer  | PRJEB7774      |
| SAMEA3136766       | Colorectal cancer  | PRJEB7774      |
| SAMEA3136728       | Colorectal cancer  | PRJEB7774      |
| SAMEA3136756       | Colorectal cancer  | PRJEB7774      |
| SAMEA3136753       | Colorectal cancer  | PRJEB7774      |
| SAMEA3136737       | Colorectal cancer  | PRJEB7774      |
| SAMEA3136726       | Colorectal cancer  | PRJEB7774      |
| SAMEA3136734       | Colorectal cancer  | PRJEB7774      |
| SAMEA3136758       | Colorectal cancer  | PRJEB7774      |
| SAMEA3136750       | Colorectal cancer  | PRJEB7774      |
| SAMEA3136742       | Colorectal cancer  | PRJEB7774      |
| SAMEA3541516       | Control            | PRJEB10878     |
| SAMEA3541517       | Control            | PRJEB10878     |
| SAMEA3541518       | Control            | PRJEB10878     |
| SAMEA3541519       | Control            | PRJEB10878     |
| SAMEA3541520       | Control            | PRJEB10878     |
| SAMEA3541521       | Control            | PRJEB10878     |
| SAMEA3541522       | Control            | PRJEB10878     |
| SAMEA3541523       | Control            | PRJEB10878     |
| SAMEA3541524       | Control            | PRJEB10878     |
| SAMEA3541526       | Control            | PRJEB10878     |
| SAMEA3541527       | Control            | PRJEB10878     |
| SAMEA3541528       | Control            | PRJEB10878     |
| SAMEA3541529       | Control            | PRJEB10878     |
| SAMEA3541530       | Control            | PRJEB10878     |
| SAMEA3541592       | Control            | PRJEB10878     |
| SAMEA3541593       | Control            | PRJEB10878     |
| SAMEA3541477       | Control            | PRJEB10878     |
| SAMEA3541479       | Control            | PRJEB10878     |
| SAMEA3541489       | Control            | PRJEB10878     |
| SAMEA3541493       | Control            | PRJEB10878     |
| SAMN00829166       | Control            | PRJNA46321     |
| SAMN00829167       | Control            | PRJNA46321     |
| SAMN00829168       | Control            | PRJNA46321     |
| SAMN00829169       | Control            | PRJNA46321     |
| SAMN00829170       | Control            | PRJNA46321     |
| SAMN00829173       | Control            | PRJNA46321     |
| SAMN00829174       | Control            | PRJNA46321     |
| SAMN00829177       | Control            | PRJNA46321     |

## References

1. Coker OO, Wu WKK, Wong SH, Sung JJ, Yu J. 2020. Altered gut archaea composition and interaction with bacteria are associated with colorectal cancer. *Gastroenterology* 159:1459-1470. e5.
